# Supplementary material for: Tax1bp1 enhances bacterial virulence and promotes inflammatory responses during Mycobacterium tuberculosis infection of alveolar macrophages
Source: PubMed Central journal article supplement (PMC11702572; doi:10.1101/2024.12.16.628616), 2024-12-16
Supplement: NIHPP2024.12.16.628616v1-supplement-1.pdf [file NIHPP2024.12.16.628616v1-supplement-1.pdf]

492 **Supplemental Figure Legends**

493 **Figure 1-figure supplement 1. *Tax1bp1* contributes to *M. tuberculosis* virulence and inflammatory**  
494 **cytokine responses.** (A) In an independent experiment, male and female mice infected by the aerosol  
495 route with *M. tuberculosis* were euthanized at 1-, 9-, 21-, and 50 days post-infection. Lung homogenates  
496 were enumerated for CFU. Results are the mean  $\pm$  SEM from five mice. The mean experimental inoculum  
497 was 104 CFU as determined by CFU enumeration at 1-day post-infection. (B) Cytokine levels from  
498 infected lung homogenates at 9-, 21-, and 50 days post-infection were measured by ELISA. Results are  
499 the mean  $\pm$  SEM from five samples. The p-values from t-test comparisons are shown.

500 **Figure 1-figure supplement 2. Lung pathology and neutrophil recruitment were similar during *M.***  
501 ***tuberculosis* aerosol infection of wild-type and *Tax1bp1*<sup>-/-</sup> mice.** (A) Paraffin-embedded thin sections  
502 of lung samples from infected wild-type and *Tax1bp1*<sup>-/-</sup> mice were stained with hematoxylin and eosin  
503 (H&E). (B) Pathology was analyzed in H&E-stained images from five infected wild-type and five *Tax1bp1*<sup>-/-</sup>  
504 mice at 21- and 50 days post-infection. (C) Paraffin-embedded thin sections of the lung from infected  
505 wild-type and *Tax1bp1*<sup>-/-</sup> mice were stained with antibodies against myeloperoxidase. Antibody staining  
506 was detected with 3,3'-diaminobenzidine. (D) Quantitative analysis of the percentage of cells that stained

507 positive for myeloperoxidase is shown. Results are the mean  $\pm$  SEM from five mice. Brackets indicate p-  
508 values from t-test comparisons.

509 **Figure 1-figure supplement 3. Ubiquitin colocalizes with *M. tuberculosis* in the lungs during**  
510 **murine aerosol infection of wild-type and *Tax1bp1*<sup>-/-</sup> mice.** (A) Serial thin sections of paraffin-  
511 embedded lung specimens were stained with antibodies against ubiquitin, *M. tuberculosis*, or hematoxylin  
512 and eosin. Antibodies were detected with 3,3'-diaminobenzidine. (B) Quantitative analysis of ubiquitin  
513 staining pixel overlap with *M. tuberculosis* in overlaid images. Results are mean  $\pm$  SEM from five  
514 samples. The p-value from the t-test comparison is shown.

515 **Figure 2-figure supplement 1. *Tax1bp1* enhances *L. monocytogenes* growth during murine**  
516 **infection.** In an independent experiment, mice were infected with *L. monocytogenes* by the intravenous  
517 route, and CFU enumerated from spleen and liver homogenates at 48 hours post-infection. Results are  
518 the mean  $\pm$  SEM from five mice. Brackets indicate p-values from t-test comparisons. CFU data were  
519 logarithmically transformed prior to statistical analysis.

520 **Figure 2-figure supplement 2. *Tax1bp1* promotes the formation of microabscesses and**  
521 **lymphocyte depletion during *L. monocytogenes* infection.** (A, B) Serial thin sections of paraffin-  
522 embedded spleen and liver specimens from mice infected by the intraperitoneal route collected at 72  
523 hours post-infection were stained with hematoxylin and eosin. (C-E) Pathology was analyzed in H&E-  
524 stained images from five infected wild-type and 5 *Tax1bp1*<sup>-/-</sup> mice at 72 hours post-infection.

525 **Figure 3-figure supplement 1. Gating strategy used to identify myeloid subsets.** A representative  
526 flow panel is shown depicting the gating strategy for identification and sorting of myeloid subsets. B, T,  
527 and NK cells were gated out. AMs (CD11b<sup>lo</sup>CD11c<sup>hi</sup>SiglecF<sup>hi</sup>), MNC1 (SiglecF<sup>-</sup>CD11b<sup>+</sup>CD11c<sup>lo</sup>MHCII<sup>+</sup>),  
528 MNC2 (SiglecF<sup>-</sup>CD11b<sup>+</sup>CD11c<sup>hi</sup>MHCII<sup>hi</sup>), and neutrophils (Neut; SiglecF<sup>-</sup>Ly6G<sup>hi</sup>CD11b<sup>hi</sup>) were sorted.  
529 Sorted cells were plated for *Mtb* CFU enumeration. The gating strategy used to identify ZsGreen-positive  
530 cells is shown in the bottom row.

531 **Figure 3-figure supplement 2. *Tax1bp1* promotes *Mtb* growth in AMs, PMNs, and MNC2 following**  
532 **low-dose aerosol infection.** In an independent experiment, mice were infected with aerosolized *Mtb*

533 expressing ZsGreen. Five wild-type and five *Tax1bp1*<sup>-/-</sup> mice were euthanized at 1-, 7-, 14-, and 21 days  
534 post-infection. CFU were measured from lung homogenates at 1 day post-infection, which revealed the  
535 mean infectious dose of *Mtb* was 224 CFU/mouse. At 7-, 14-, and 21 days post-infection, lung cells were  
536 pooled and stained for AMs, PMNs, and recruited monocyte 1 and 2 subsets (MNC1, 2). The number of  
537 ZsGreen-positive counts from innate immune cells was quantified by analytical flow cytometry. Data were  
538 normalized to the number of cells analyzed.

539 **Figure 6-figure supplement 1. Pathogen and host differential gene expression analysis volcano**  
540 **plots.** Volcano plots display the differentially regulated genes from (A) *Mtb* and (B) the host during wild-  
541 type and *Tax1bp1*<sup>-/-</sup> AM infection with *Mtb*. The volcano plots display the log<sub>2</sub>fold change of normalized  
542 mean hit counts in wild-type vs. *Tax1bp1*<sup>-/-</sup> samples and -log<sub>10</sub>(adj. p-value for host genes or unadjusted  
543 p-value for *Mtb* genes). Colors denote genes that were upregulated (purple) or downregulated (green) in  
544 wild-type compared to *Tax1bp1*<sup>-/-</sup> samples.

545 **Figure 8-figure supplement 1. Tax1bp1 enhances necrotic-like cell death and delays apoptosis**  
546 **during *Mtb* infection of AMs.** As described in the Figure 8 legend, AMs were infected with *Mtb* at a  
547 M.O.I. of 1 in the presence of PI (propidium iodide) and CellEvent without (A) or with (B) IFN- $\gamma$  added to  
548 the media. Fluorescence images were obtained at 20X magnification in two positions per well in three  
549 replicate wells. Representative fluorescence and brightfield microscopy images are displayed at days 1-8  
550 post-infection. The white bar is 100  $\mu$ m.

551 **Figure 8-figure supplement 2. Tax1bp1 does not promote necrotic-like cell death during *Mtb***  
552 **infection of BMDMs.** BMDMs were infected with *Mtb* at a M.O.I. of 1 in the presence of PI (propidium  
553 iodide) and CellEvent without (A, C) or with (B, D) IFN- $\gamma$  added to the media. Fluorescence images were  
554 obtained at 20X magnification in two positions per well in three replicate wells. Representative  
555 fluorescence and brightfield microscopy images are displayed at days 1-8 post-infection. The white bar  
556 denotes 100  $\mu$ m. (C, D) The number of fluorescent cells in each field was quantified in the green  
557 (CellEvent) and red fluorescence (PI) channels. Mean, SEM, and statistically significant FDR-adjusted p-  
558 values comparisons are displayed. For clarity, only statistically significant p-values ( $p \leq 0.05$ ) are  
559 displayed.

560 **Figure 8-figure supplement 1. Model describing Tax1bp1's function during *Mtb* infection of AMs.**  
561 Tax1bp1 enhances *Mtb* growth, inflammatory cytokine synthesis, PGE<sub>2</sub> production, and necrotic-like host  
562 cell death in AMs. Tax1bp1-deficiency, or expression of phosphosite-deficient Tax1bp1, decreases *Mtb*  
563 growth in AMs.

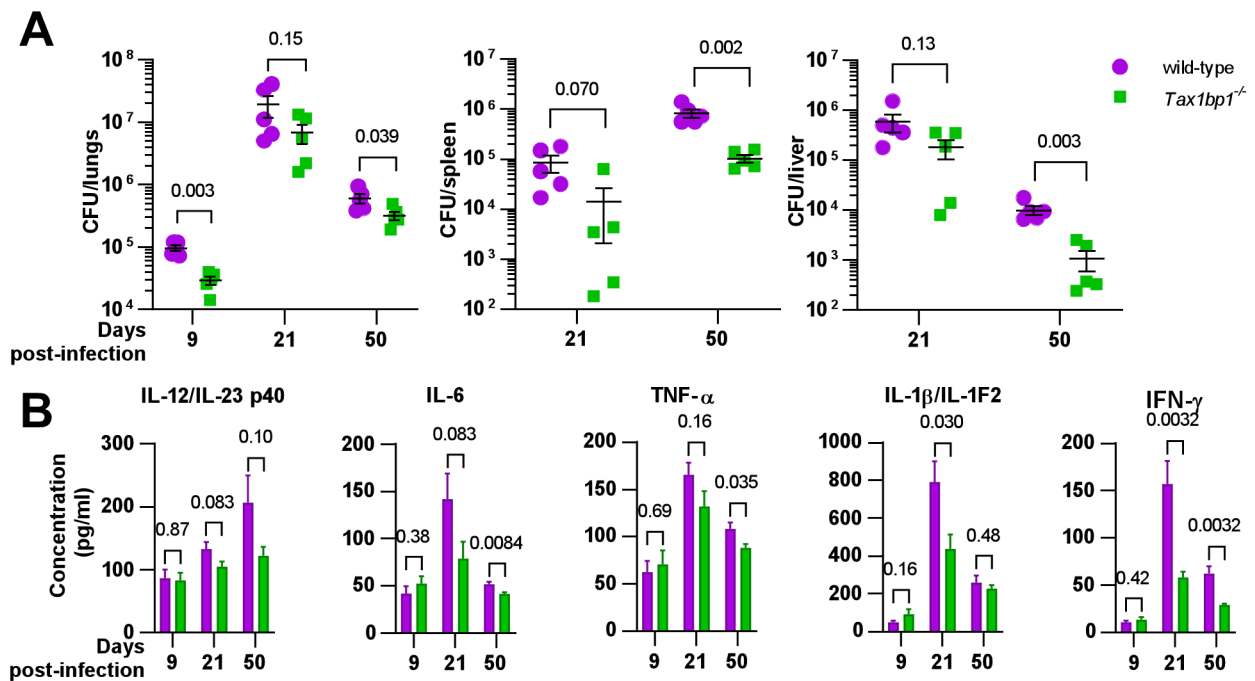

Figure 1-figure supplement 1



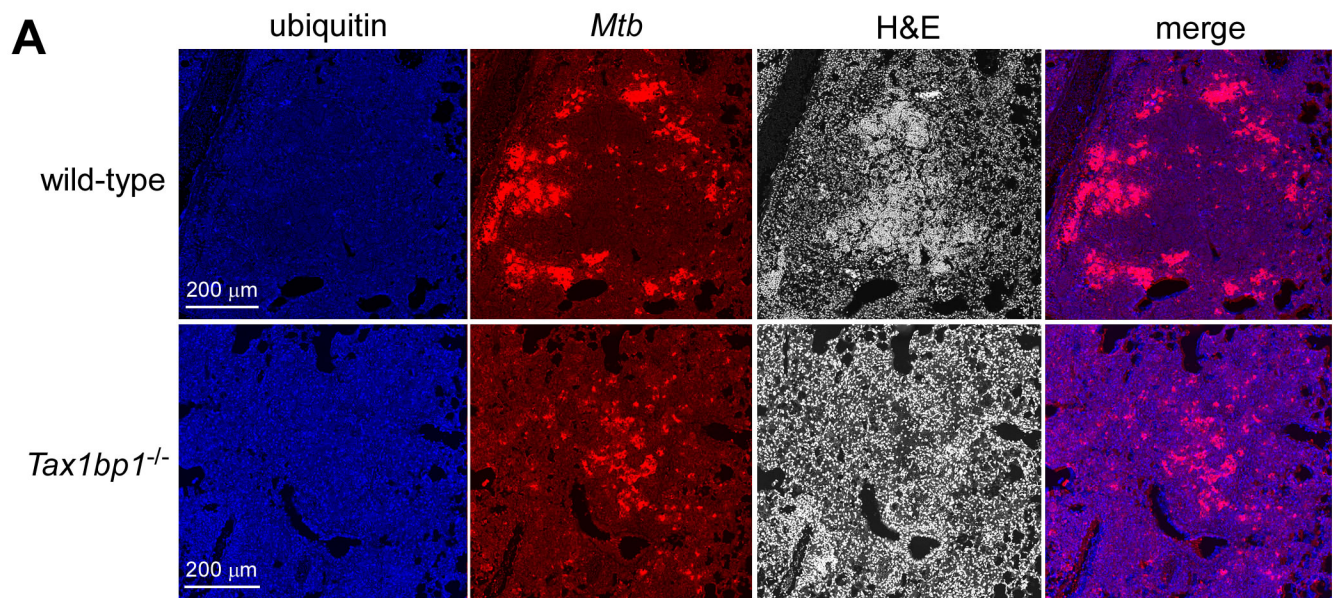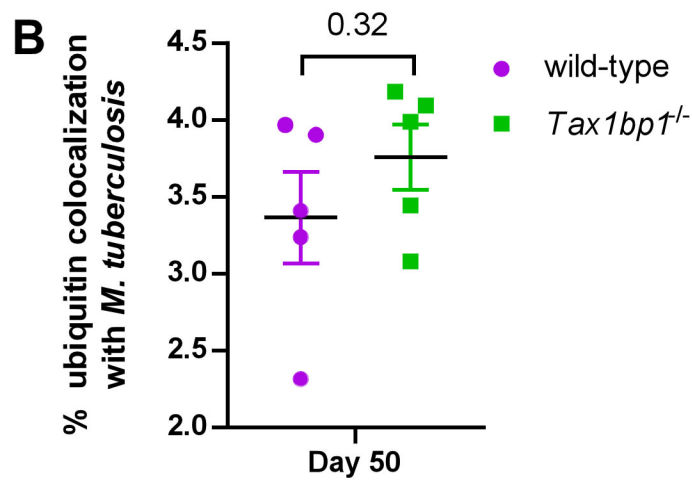

Figure 1-figure supplement 3

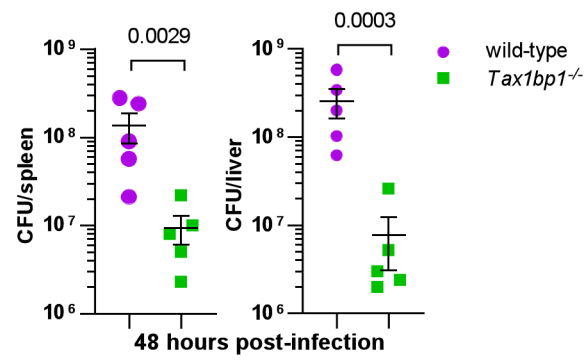

Figure 2-figure supplement 1



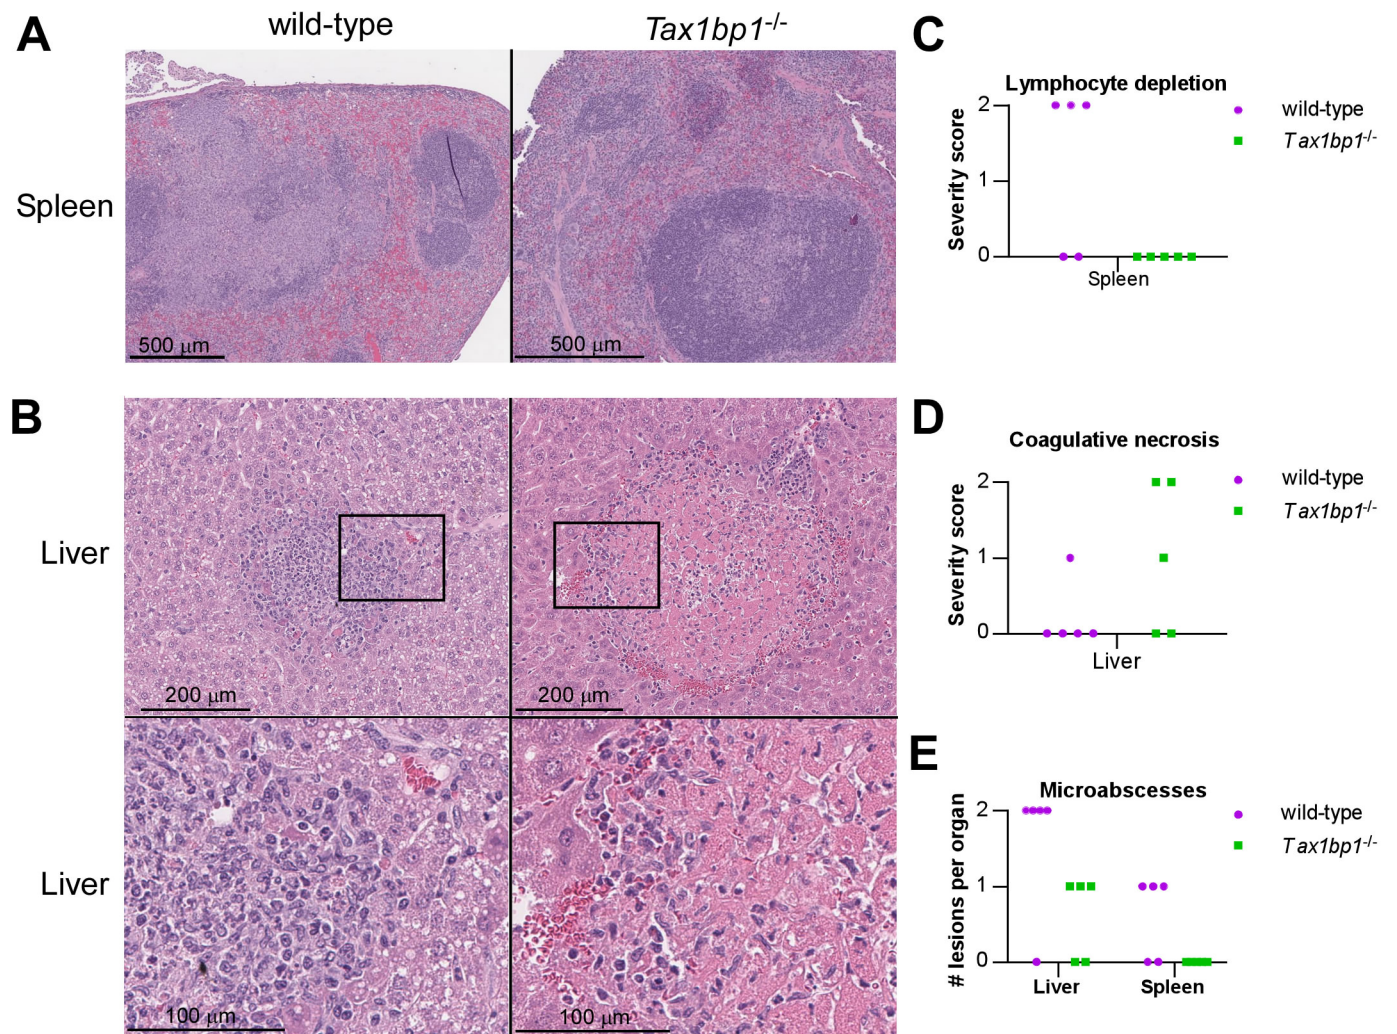

Figure 2-figure supplement 2

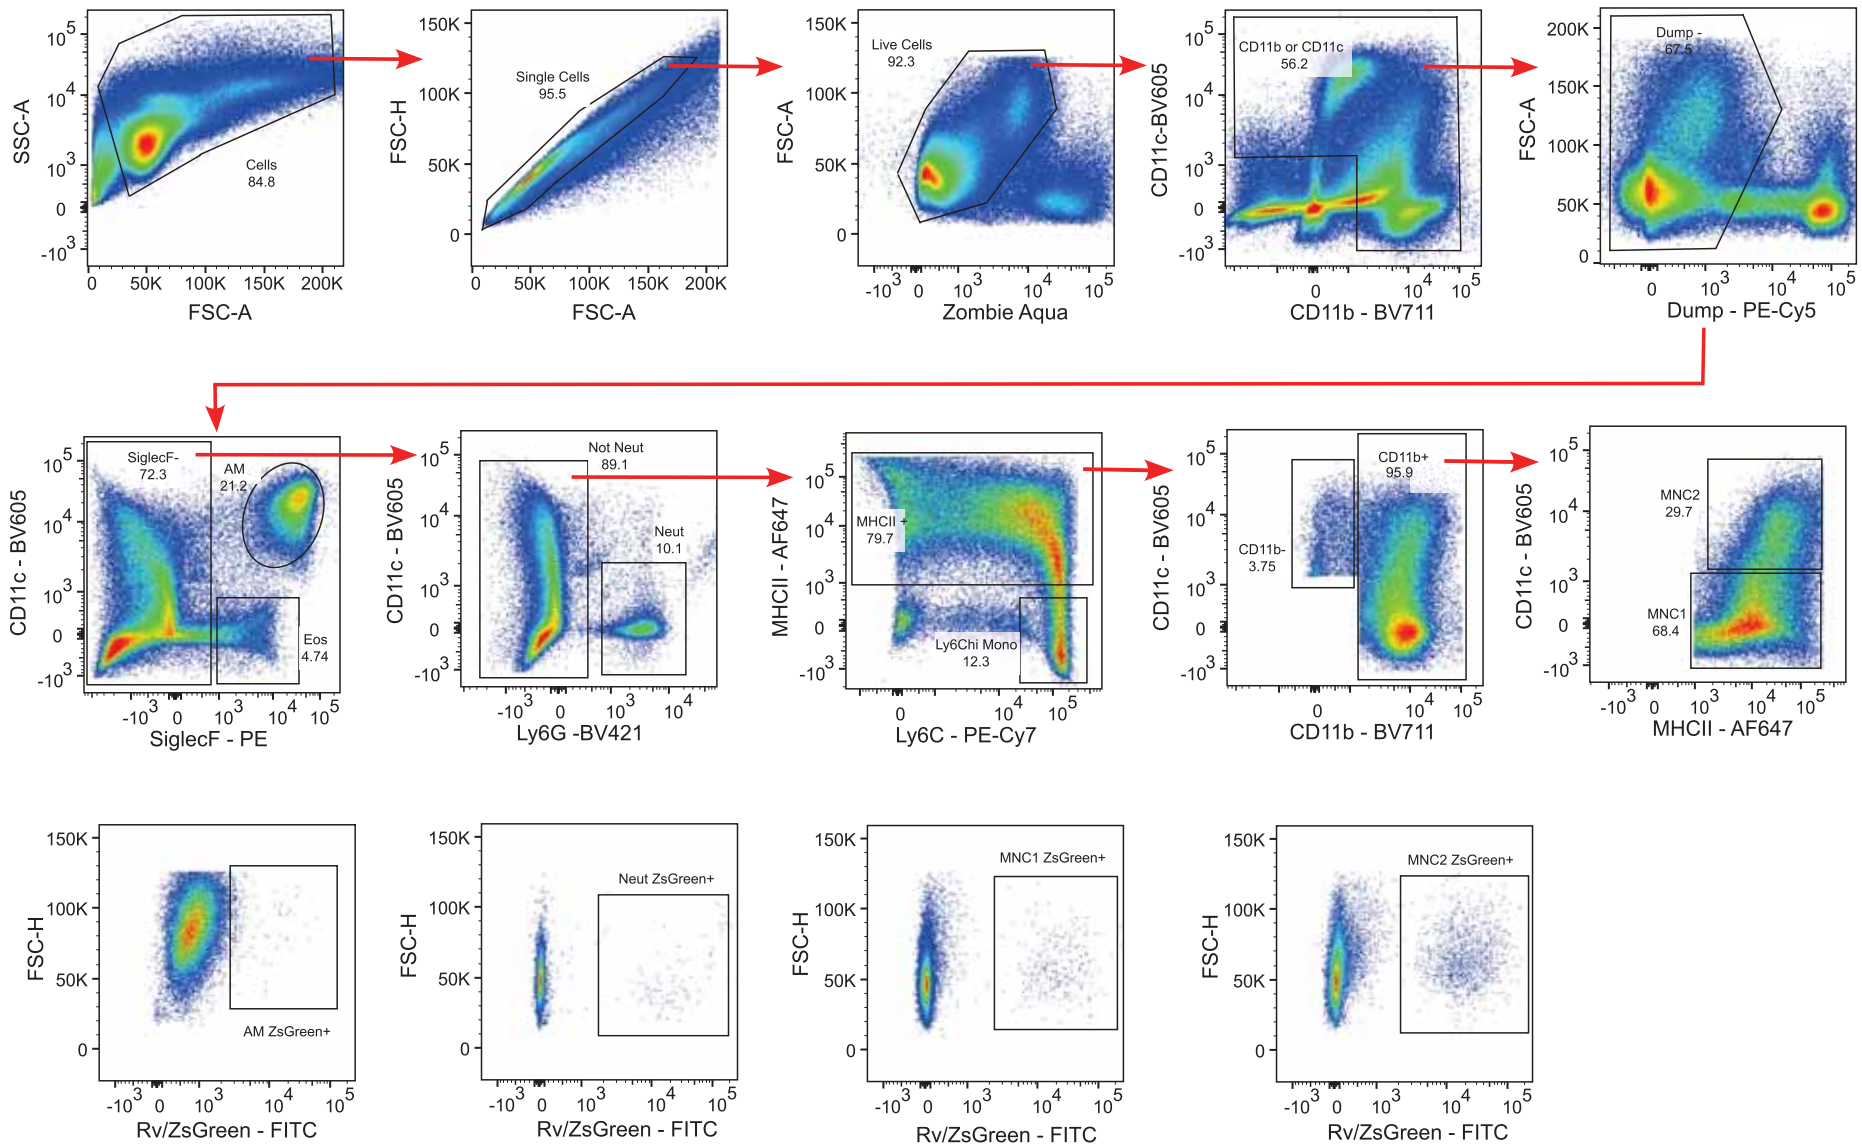

Dump:  
Thy1.2-  
CD19-  
NK1.1-

bioRxiv preprint doi: <https://doi.org/10.1101/2024.12.16.628616>; this version posted December 16, 2024. The copyright holder for this preprint (which was not certified by peer review) is the author/funder, who has granted bioRxiv a license to display the preprint in perpetuity. It is made available under aCC-BY 4.0 International license.

Figure 3-figure supplement 1

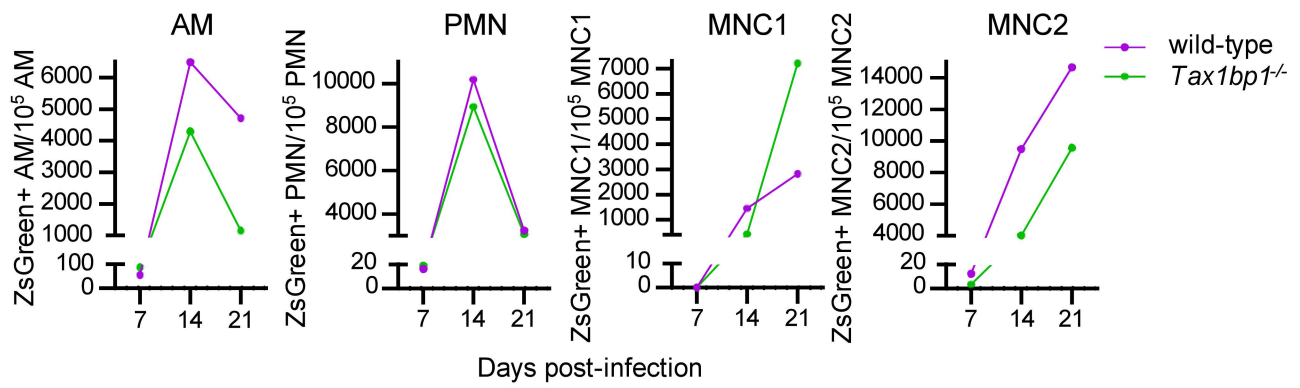

**Figure 3-figure supplement 2**

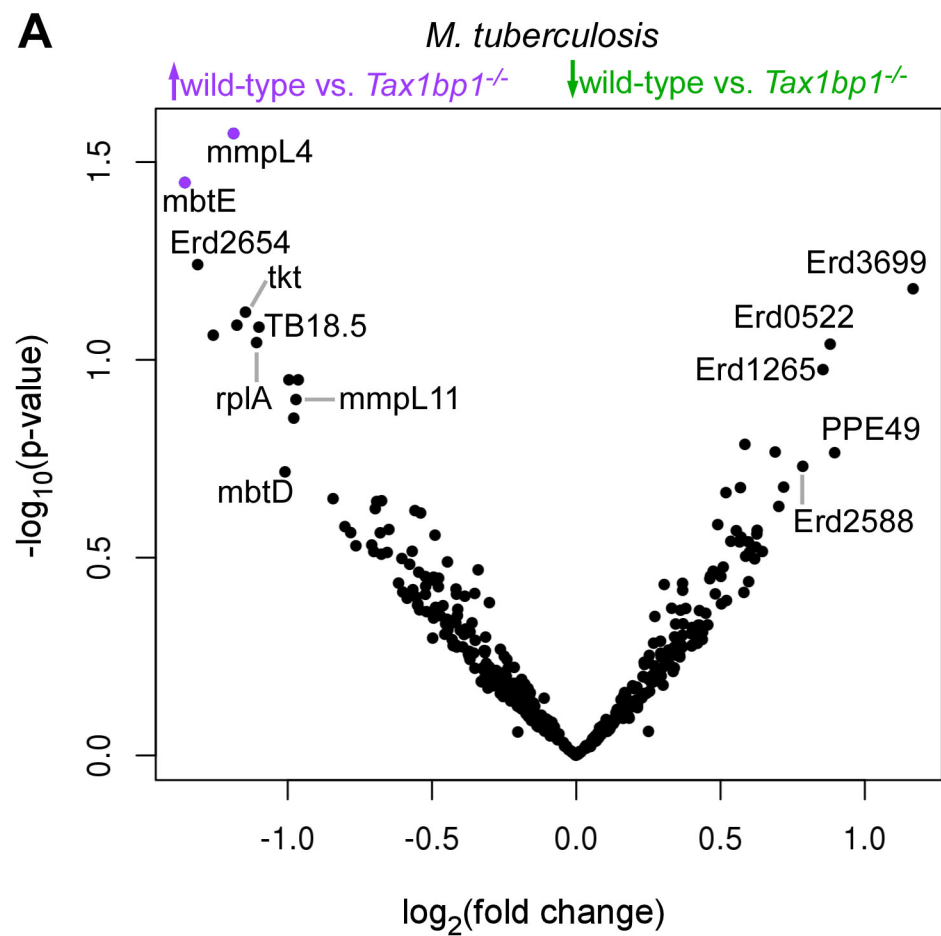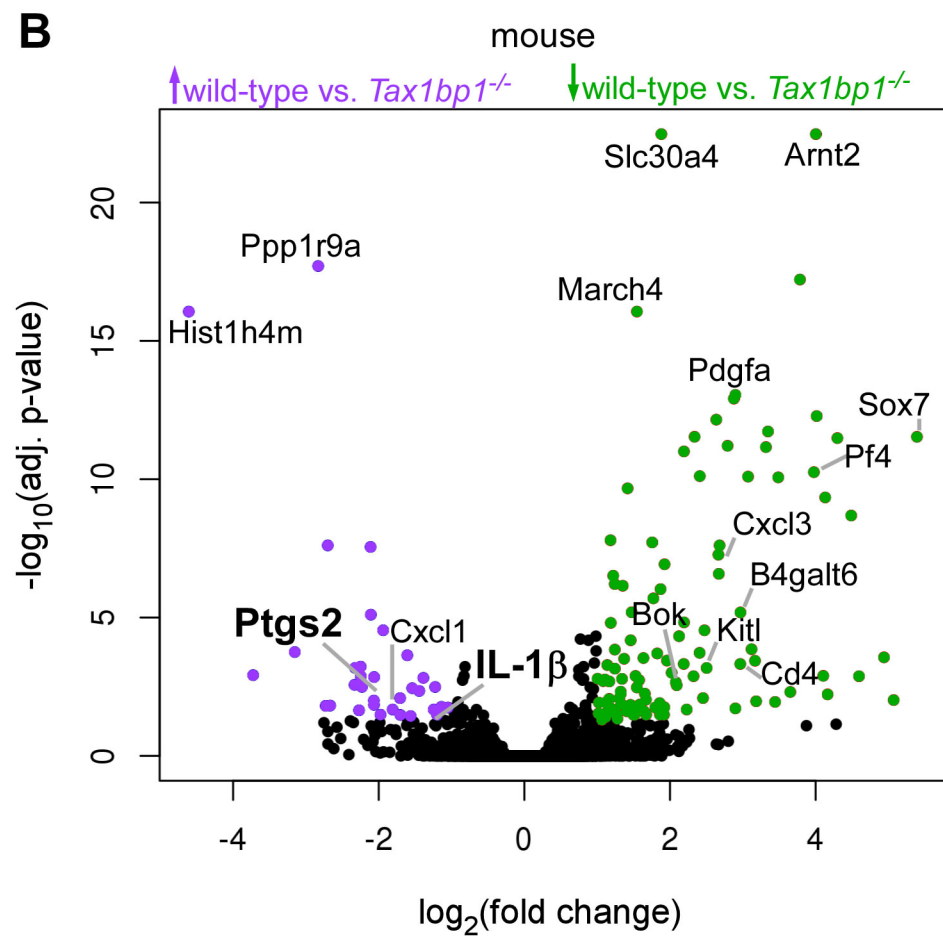

Figure 6-figure supplement 1

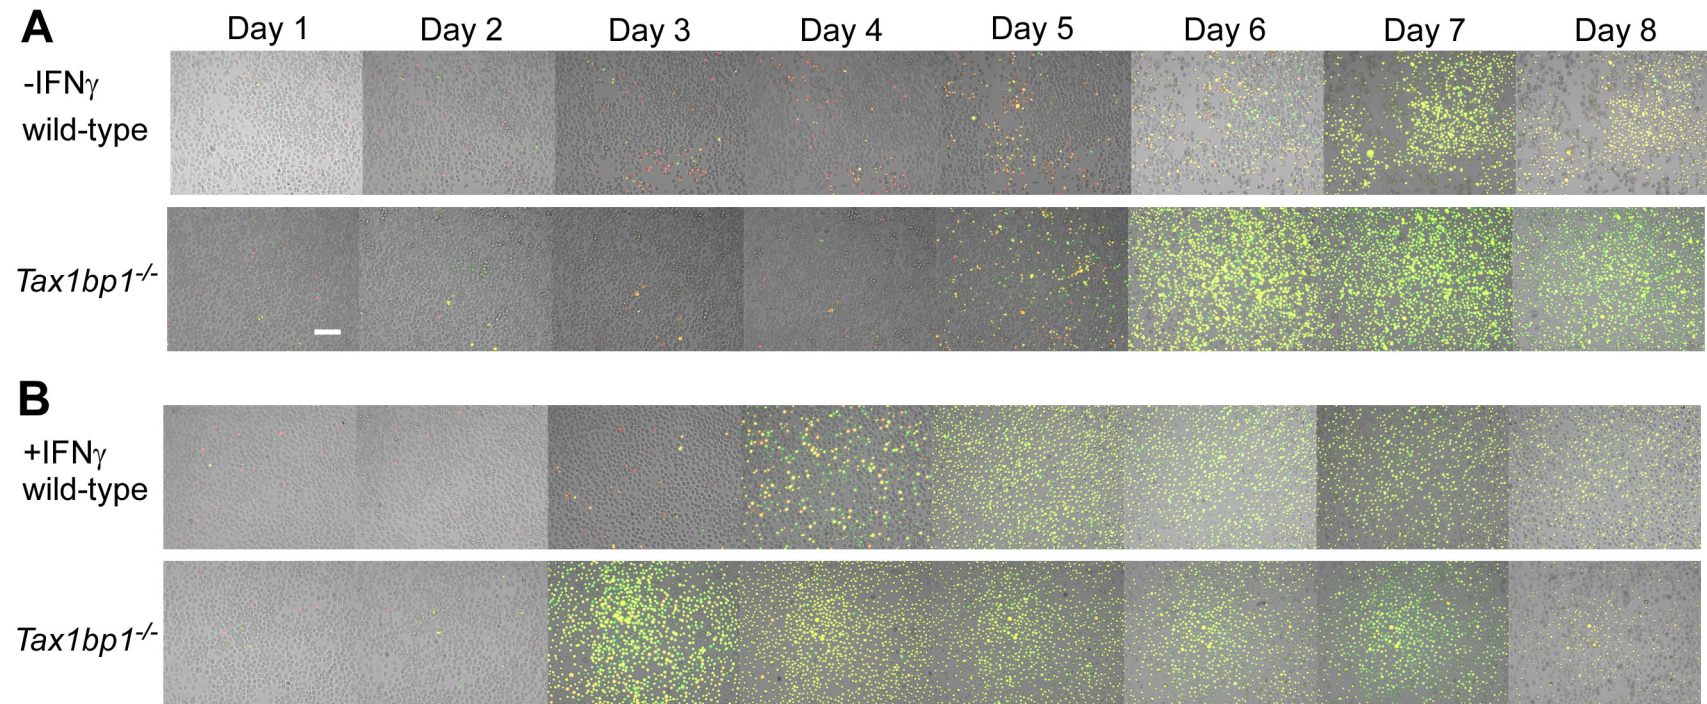

Figure 8-figure supplement 1

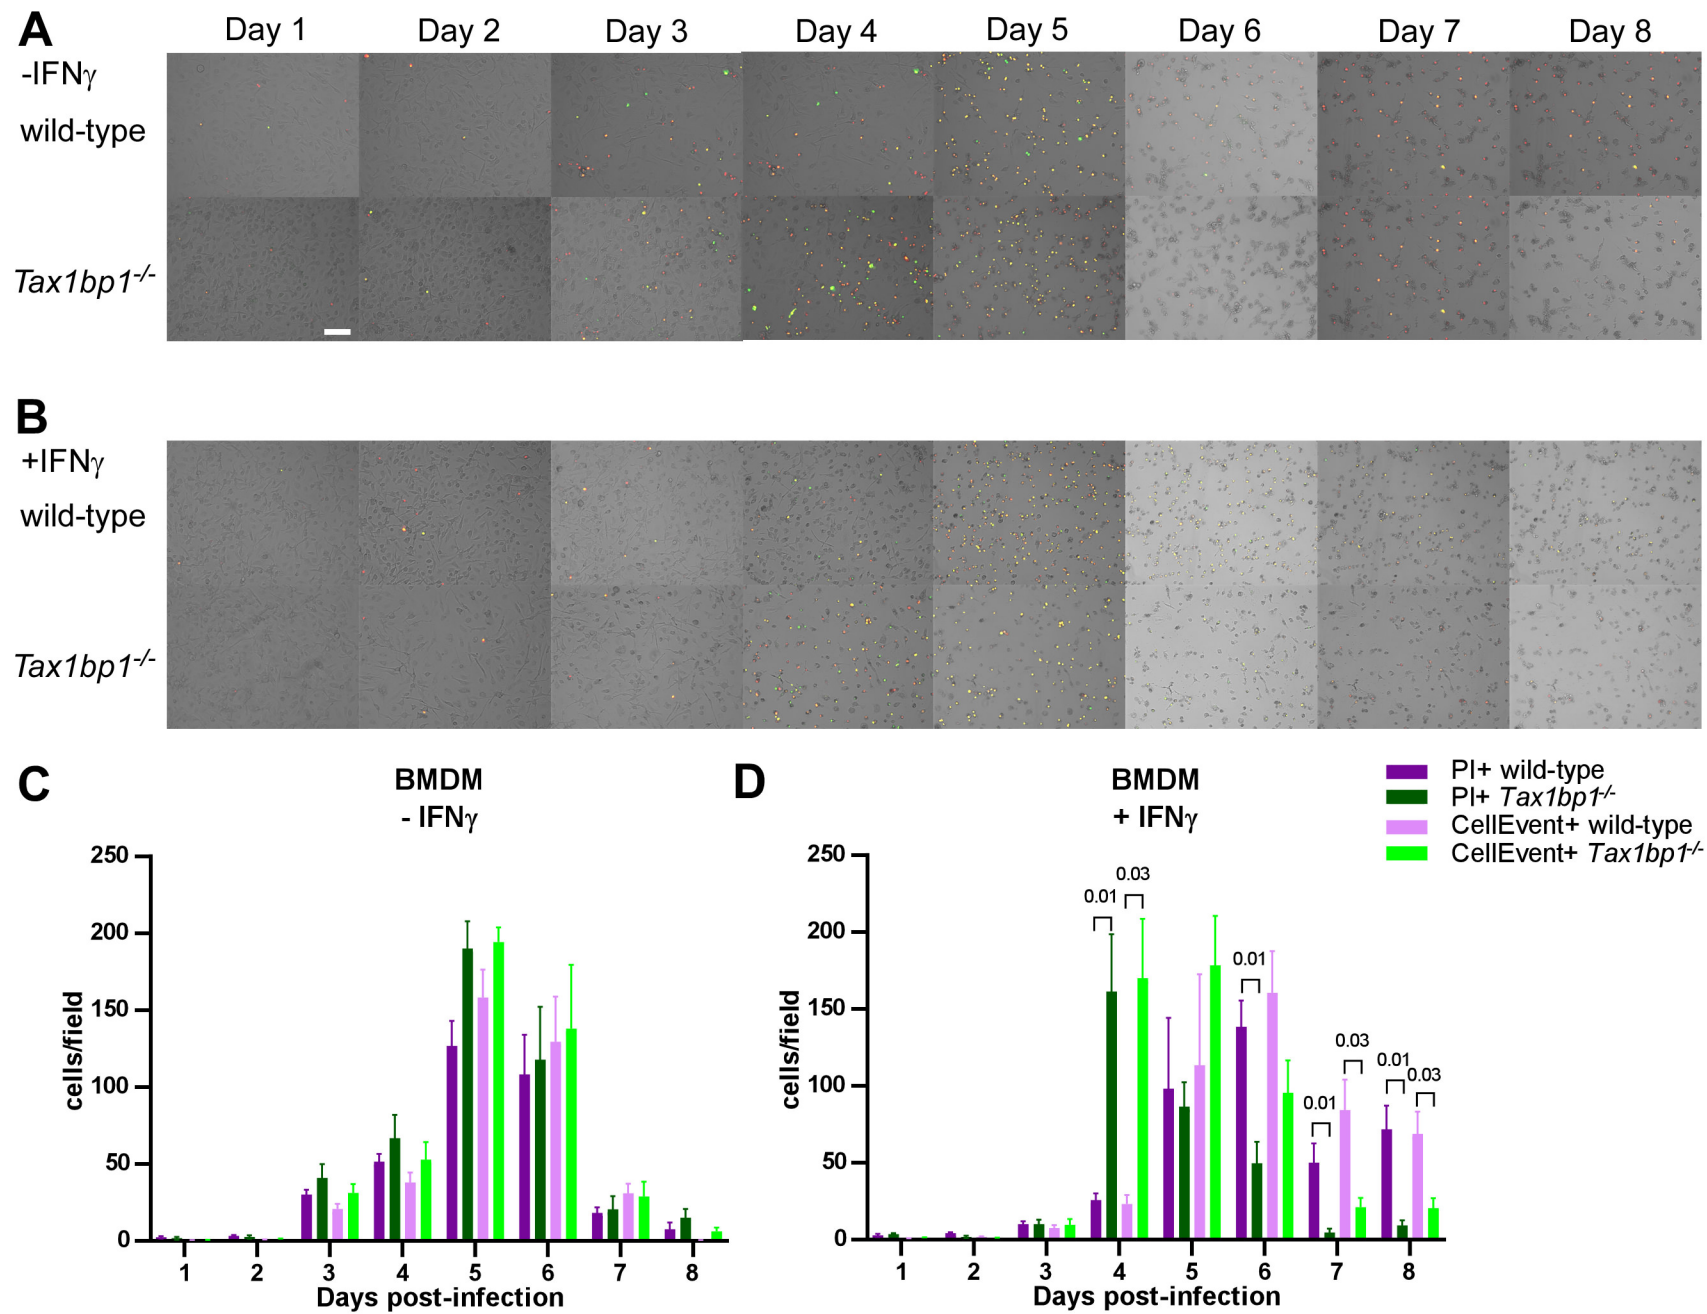

Figure 8-figure supplement 2

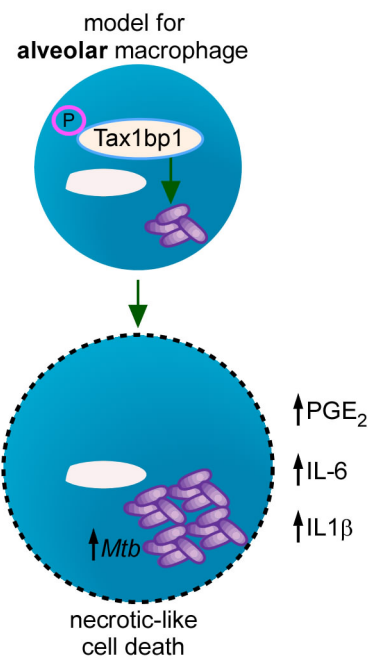

Figure 9-figure supplement 1
